# Supplementary material
Source: PubMed Central journal article supplement (PMC7587280)
Supplement: boe-11-10-6012-s001.pdf [file boe-11-10-6012-s001.pdf]

## **Fast *in vivo* multiphoton light-sheet microscopy with optimal pulse frequency: supplement**

**VINCENT MAIOLI,**  **ANTOINE BONIFACE,**  **PIERRE MAHOU,**   
**JÚLIA FERRER ORTAS, LAMIAE ABDELADIM, EMMANUEL  
BEAUREPAIRE,**  **AND WILLY SUPATTO\*** 

*Laboratory for Optics and Biosciences, Ecole Polytechnique, CNRS, INSERM, Institut Polytechnique de Paris, 91128 Palaiseau, France*

\*[willy.supatto@polytechnique.edu](mailto:willy.supatto@polytechnique.edu)

---

This supplement published with The Optical Society on 1 October 2020 by The Authors under the terms of the [Creative Commons Attribution 4.0 License](https://creativecommons.org/licenses/by/4.0/) in the format provided by the authors and unedited. Further distribution of this work must maintain attribution to the author(s) and the published article's title, journal citation, and DOI.

Supplement DOI: <https://doi.org/10.6084/m9.figshare.13003595>

Parent Article DOI: <https://doi.org/10.1364/BOE.400113>

# Fast in vivo multiphoton light-sheet microscopy with optimal pulse frequency: supplemental document

## Supplementary figures

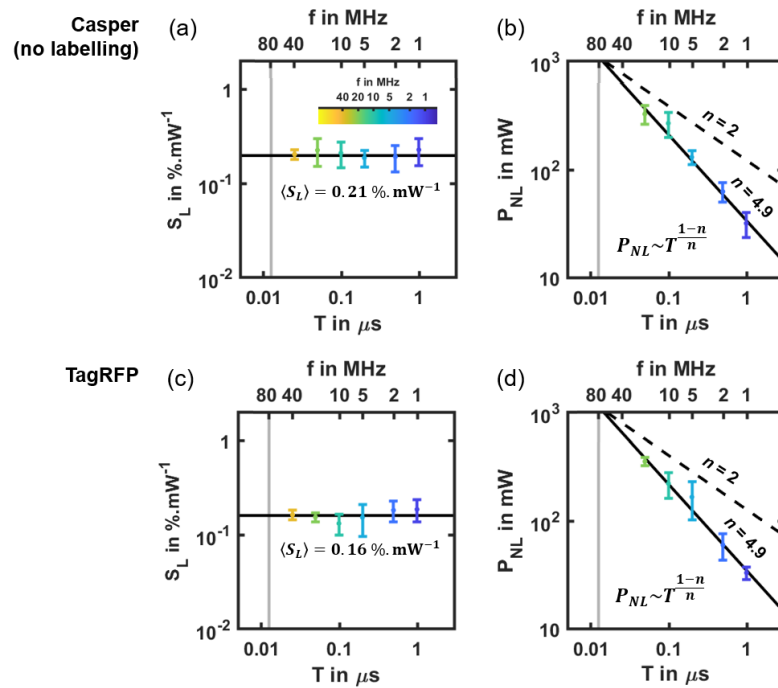

**Fig. S1.** Linear effect and nonlinear photodamage threshold in unlabeled and TagRFP labeled embryos. (a) Linear slope  $S_L$  of the HBR relative variation of unlabeled *casper* zebrafish hearts ( $N = 32$  embryos) depending on the laser pulse frequency  $f = 1/T$ . Black line indicates mean value  $\langle S_L \rangle = 0.211 \pm 0.017 \text{ } \% \cdot \text{mW}^{-1}$ . (b) Nonlinear photodamage threshold  $P_{NL}$  in unlabeled hearts ( $N = 27$  embryos) depending on the laser pulse frequency  $f = 1/T$ . Black line shows the result of the scaling law fitted on logarithmic scaled data.  $P_{NL}(T)$  follows a scaling law of order  $n \sim 4.9$ . (c) Linear slope  $S_L$  of the HBR relative variation of TagRFP labeled zebrafish hearts ( $N = 27$  embryos) depending on the laser pulse frequency  $f = 1/T$ . Black line indicates mean value  $\langle S_L \rangle = 0.161 \pm 0.014 \text{ } \% \cdot \text{mW}^{-1}$ . (d) Nonlinear photodamage threshold  $P_{NL}$  in TagRFP labeled hearts ( $N = 23$  embryos) depending on the laser pulse frequency  $f = 1/T$ . Black line shows the result of the scaling law fitted on logarithmic scaled data.  $P_{NL}(T)$  follows a scaling law of order  $n \sim 4.9$ . Error bars indicate standard deviation. Black dashed line indicates a scaling law of order  $n = 2$  to show how it deviates from 2PEF signal. Results of scaling law fits are listed in Table S2.

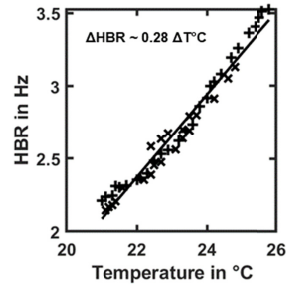

**Fig. S2.** Heart beat rate depending on temperature for 4-5 days post-fertilization zebrafish embryos. The embryos were placed in warm water and their HBR was measured as the water cooled down. HBR increases linearly with temperature. Black line indicates the result of a linear fit ( $\Delta\text{HBR in Hz} = 0.285 \pm 0.015 \Delta\text{Temperature in } ^\circ\text{C}$ ,  $R^2 = 0.97$ ).

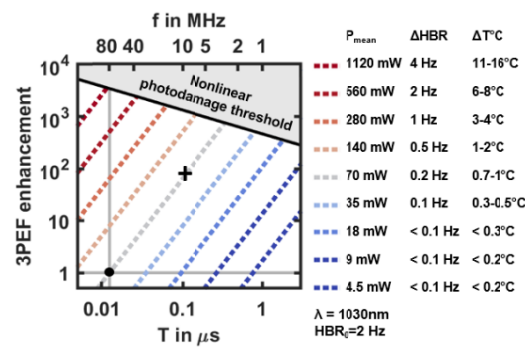

**Fig. S3.** 3PEF signal enhancement graph used to select the optimal laser pulse frequency. Signal enhancement corresponds to  $\frac{T^2 P_{\text{mean}}^3}{T_0^2 P_0^3}$  with  $T_0 = 1/f_0 = 1/80\text{ MHz}$  and  $P_0 = 70\text{ mW}$  (black dot). Solid black lines correspond to the nonlinear photodamage threshold. Dashed blue-to-red lines corresponds to line of constant mean power of slope 2 and constant linear effect (variation of heart beat rate  $\Delta\text{HBR}$  and of temperature  $\Delta T^\circ\text{C}$ ). Black cross, imaging conditions used in Fig. 6b.

## Supplementary tables

| Figure       | Experiment                      | $f$                             | $P_{mean}$                        | Laser scan speed                 | Field of view      | Frame rate            |
|--------------|---------------------------------|---------------------------------|-----------------------------------|----------------------------------|--------------------|-----------------------|
|              |                                 | MHz                             | mW                                | $\mu\text{m}\cdot\text{ms}^{-1}$ | pixel <sup>2</sup> | frame.s <sup>-1</sup> |
| 1a           | 2PEF signal                     | 4.4<br>to<br>40                 | 100                               | 40                               | 500 × 500          | 168                   |
| 1b           | SHG signal                      | 0.6<br>to<br>40                 | 100                               | 8                                | 2048 × 2048        | 41                    |
| 1c           | 3PEF signal                     | 4<br>to<br>13                   | 54                                | 40                               | 500 × 500          | 33                    |
| 4a           |                                 | 1<br>2<br>5<br>10<br>20         | 29<br>51<br>126<br>201<br>322     | 40                               | 500 × 500          | 168                   |
| S1b          | Nonlinear photodamage threshold | 1<br>2<br>5<br>10<br>20         | 32<br>63<br>131<br>269<br>327     | 40                               | 500 × 500          | 168                   |
| S1d          |                                 | 1<br>2<br>5<br>10<br>20         | 33<br>60<br>166<br>221<br>353     | 40                               | 500 × 500          | 168                   |
| 5a           | Photobleaching experiment       | 0.6<br>2<br>5<br>10<br>20<br>40 | 15<br>28<br>45<br>63<br>90<br>127 | 40                               | 500 × 500          | 168                   |
| 6b<br>Vis. 3 |                                 | 10                              |                                   |                                  | 500 × 500          | 168                   |
| Vis. 4       | 4D heart <i>in vivo</i> imaging | 10<br>or<br>40                  | 70                                | 40                               | 500 × 500          | 155                   |
| Vis. 5       |                                 | 10                              |                                   |                                  | 400 × 148          | 488                   |

**Table S1.** Experimental parameters.  $f$  and  $P_{mean}$  are the laser repetition rate (or pulse frequency) and mean power, respectively. Vis. For visualization.

| Fig. | Optical effect                            | Scaling law                                        | $P_{mean}$                          | Sample            | $A$    | $B$   | $R^2$ | $n$                                                                 | $n$ : 90% conf. interval |
|------|-------------------------------------------|----------------------------------------------------|-------------------------------------|-------------------|--------|-------|-------|---------------------------------------------------------------------|--------------------------|
|      |                                           | <i>Optical effect</i> $\sim T^?$                   |                                     |                   |        |       |       |                                                                     |                          |
|      |                                           |                                                    |                                     |                   |        |       |       | Linear regression:<br>$\log(\text{Optical effect}) = A \log(T) + B$ |                          |
| 1a   | 2PEF signal                               | $2PEF \sim T^{n-1}$<br>$n = A + 1$                 | $P_{mean} = cst$                    | mCherry embryos   | 1.2    | 2.1   | 0.91  | 2.2                                                                 | [1.9, 2.5]               |
| 1b   | SHG signal                                | $SHG \sim T^{n-1}$<br>$n = A + 1$                  | $P_{mean} = cst$                    | KTP nanocrystals  | 1.0    | 1.9   | 0.998 | 2.0                                                                 | [2.0, 2.1]               |
| 1c   | 3PEF signal                               | $3PEF \sim T^{n-1}$<br>$n = A + 1$                 | $P_{mean} = cst$                    | Fluospheres       | 2.0    | 2.0   | 0.999 | 3.0                                                                 | [3.0, 3.1]               |
| 3a   |                                           |                                                    |                                     | mCherry embryos   | 0.032  | 1.3   | 0.016 | 1.0                                                                 | [0.95,1.1]               |
| S1a  | Linear effect $S_L$                       | $S_L \sim T^{n-1}$<br>$n = A + 1$                  | $P_{mean}$ varies to estimate $S_L$ | Unlabeled embryos | -0.009 | 1.3   | 0.002 | 0.99                                                                | [0.92,1.1]               |
| S1c  |                                           |                                                    |                                     | TagRFP embryos    | 0.047  | 1.2   | 0.05  | 1.0                                                                 | [0.98,1.1]               |
| 4a   |                                           |                                                    |                                     | mCherry embryos   | -0.83  | 1.5   | 0.98  | 5.8                                                                 | [4.4, 8.2]               |
| S1b  | Nonlinear photo-damage threshold $P_{NL}$ | $P_{NL} \sim T^{\frac{1-n}{n}}$<br>$n = 1/(A + 1)$ | $P_{mean} = P_{NL}$                 | Unlabeled embryos | -0.80  | 1.5   | 0.93  | 4.9                                                                 | [3.6, 7.8]               |
| S1d  |                                           |                                                    |                                     | TagRFP embryos    | -0.80  | 1.5   | 0.90  | 4.9                                                                 | [3.3, 9.8]               |
| 5b   | Photo-bleaching rate $k$                  | $k \sim T^{\frac{n}{2}-1}$<br>$n = 2A + 2$         | $P_{mean} \sim T^{-2}$              | mCherry embryos   | 0.67   | -2.46 | 0.99  | 3.3                                                                 | [3.2, 3.5]               |

**Table S2.** Scaling laws of optical effects and estimation of their  $n$ -order using linear regression of logarithmic scaled data.  $T$  and  $P_{mean}$  are the laser pulse period and mean power, respectively.

## Supplementary visualizations

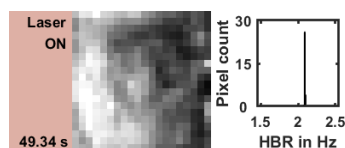

**Visualization 1.** Estimation of instantaneous HBR. A sequence of white light illumination images of the embryonic heart (left) is used to estimate the instantaneous HBR. HBR histogram from the 30 best pixels (right) demonstrate the good precision of the measure.

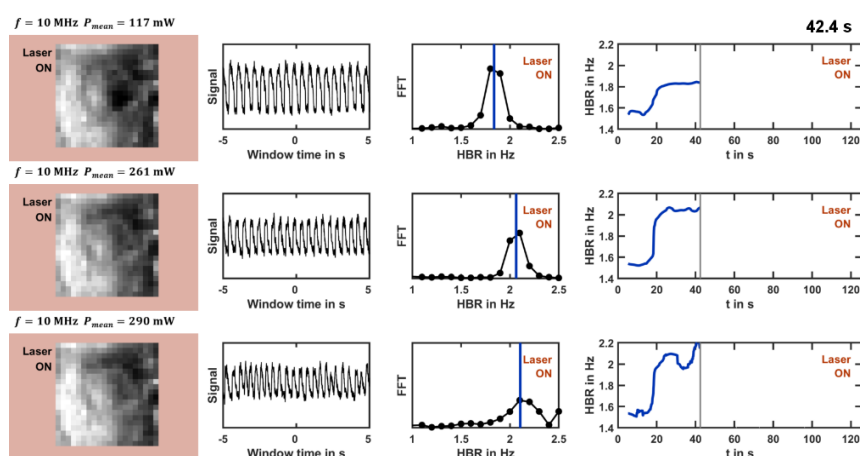

**Visualization 2.** Experimental workflow of HBR analysis. The analyses of three typical acquisitions, at  $P_{mean} = 117$  mW (top), 261 mW (middle) and 290 mW (bottom) on the same zebrafish heart at  $f = 10$  MHz are presented. First column: white light illumination images of the heart of the embryo. Second column: periodic signal fluctuation extracted from individual pixels over a 10 s window. Third column: windowed Fourier transform of the signal to extract of the HBR over that window. Bottom line: HBR as a function of time. Nonlinear photodamage are observed at  $P_{mean} = 290$  mW with heart beat arrhythmia followed by intense signals.

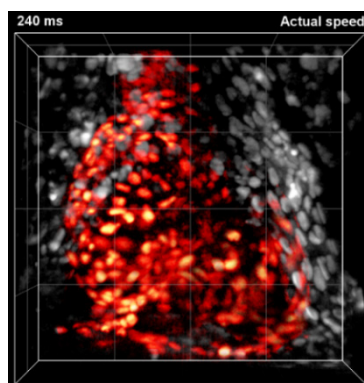

**Visualization 3.** 4D reconstruction of the zebrafish beating heart imaged with 2P-SPIM at 168 frames per second with optimized laser parameters. Histone mCherry-labeled zebrafish embryo at 3 days post-fertilization imaged using  $f = 10$  MHz and  $P_{mean} = 70$  mW with  $200 \times 200 \times 100 \mu\text{m}$  or  $500 \times 500 \times 100$  voxels field-of-view. Heart cells in red were manually segmented. Grid spacing of  $50 \mu\text{m}$ .

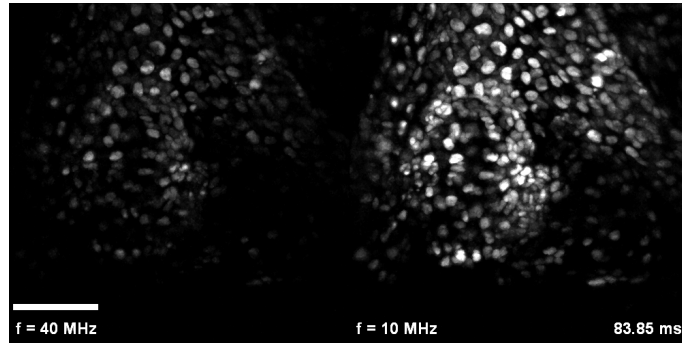

**Visualization 4.** 2PEF signal enhancement using  $f = 10$  compared to  $f = 40$  MHz laser pulse frequency at constant mean power. 4D reconstructions of the zebrafish beating heart imaged with 2P-SPIM at 155 frames per second (74 frames per cardiac cycle). Histone mCherry-labeled zebrafish embryo at 4 days post-fertilization imaged using  $f = 40$  MHz (left) or  $f = 10$  MHz (right) and  $P_{mean} = 70$  mW with  $200 \times 200 \times 100 \mu\text{m}$  or  $500 \times 500 \times 100$  voxels field-of-view. Cardiac cycles were manually synchronized. Movie speed slowed down 6.2 times compared to actual speed. Scale bar of  $50 \mu\text{m}$ .

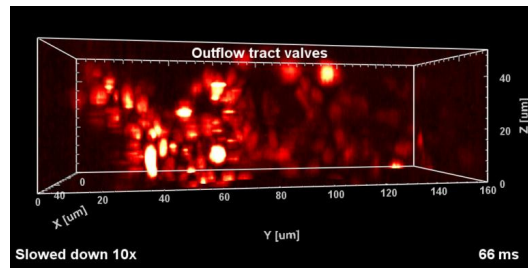

**Visualization 5.** 4D reconstruction of the outflow tract valves in the zebrafish beating heart imaged with 2P-SPIM at 488 frames per second with optimized laser parameters. Histone mCherry-labeled zebrafish embryo at 4 days post-fertilization imaged using  $f = 10$  MHz and  $P_{mean} = 70$  mW with  $160 \times 59 \times 50 \mu\text{m}$  or  $400 \times 148 \times 50$  voxels field-of-view.
